# Supplementary material for: Structure of the thermo-sensitive TRP channel TRP1 from the alga Chlamydomonas reinhardtii
Source: PubMed Central journal article supplement (PMC6744473; doi:10.1038/s41467-019-12121-9), 2019-09-13
Supplement: 41467_2019_12121_MOESM1_ESM.pdf [file 41467_2019_12121_MOESM1_ESM.pdf]

## Supplementary Information

**Structure of the Thermo-Sensitive TRP Channel TRP1 from the Alga *Chlamydomonas***

***Reinhardtii***

McGoldrick et al.

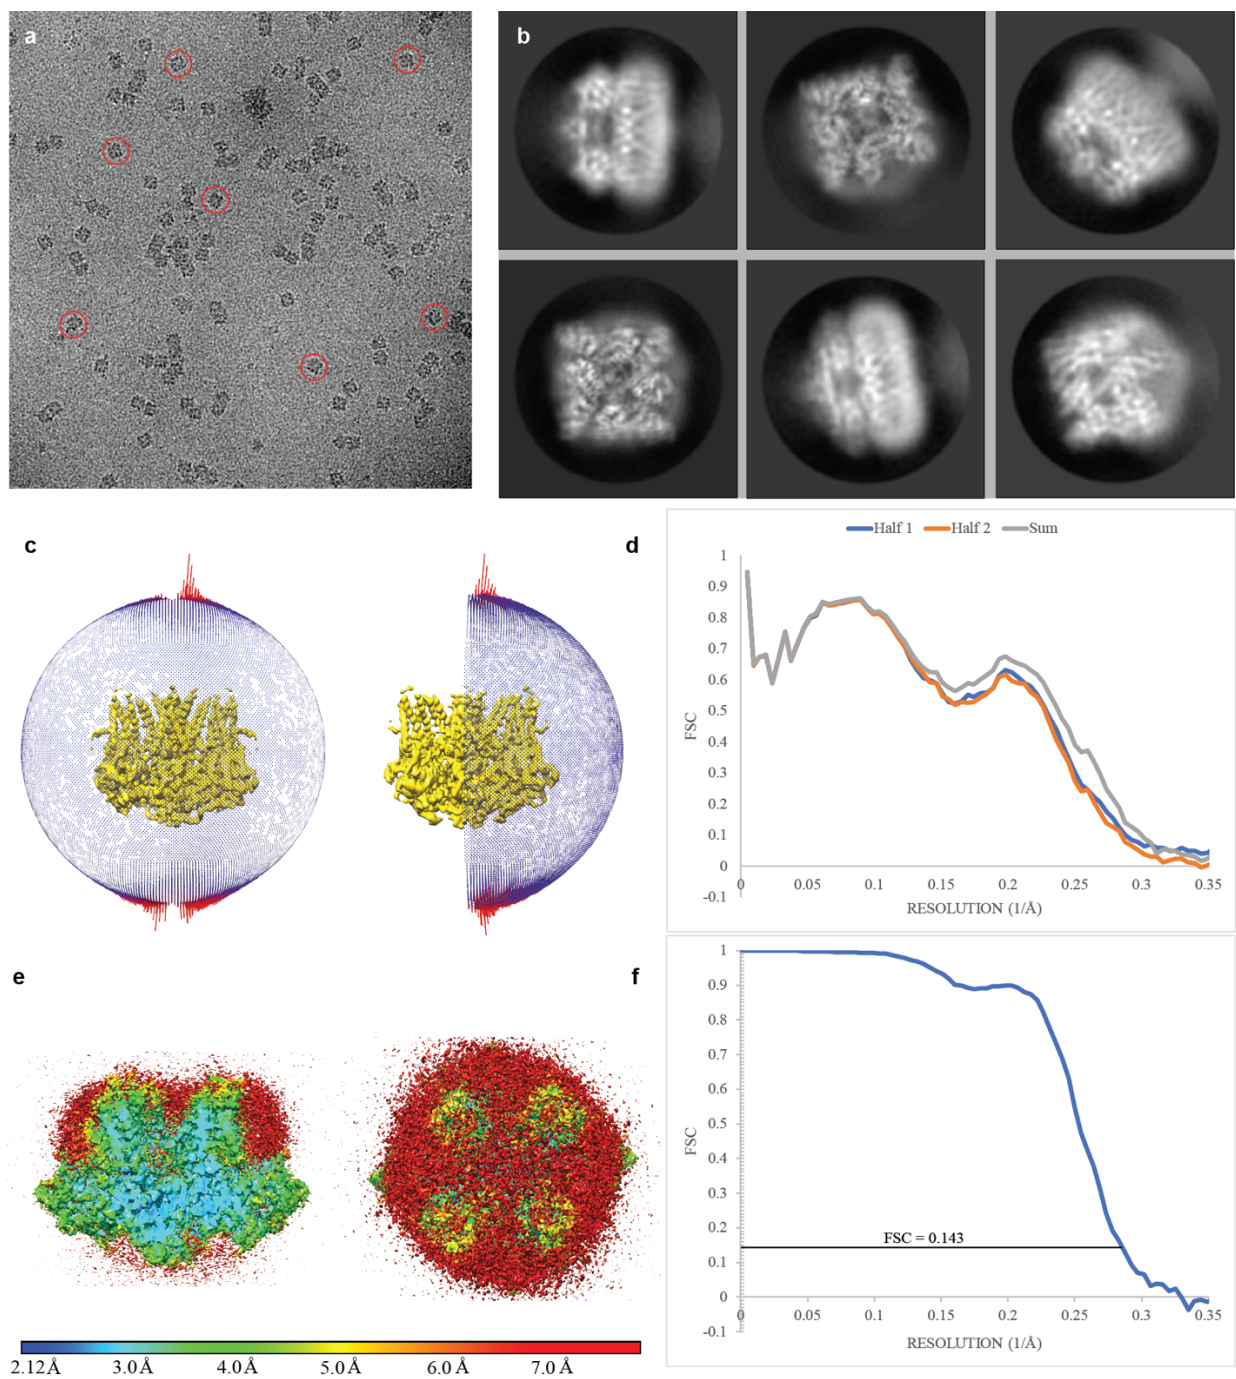

**Supplementary Figure 1. Cryo-EM overview of crTRP1 in GDN detergent.** **a**, Micrograph of crTRP1 taken using a Gatan K2 DED with example particles circled in red. **b**, Reference free 2D class averages of crTRP1 in different orientations. **c**, Euler angle distribution of particles contributing to the final reconstruction; larger red cylinders represent orientations comprising more particles. **d**, FSC curves calculated between two unfiltered half-maps and the final map and a model whose coordinates were randomized and refined against only half map 1. **e**, Local resolution predicted by ResMap. **f**, FSC curve calculated between half maps.

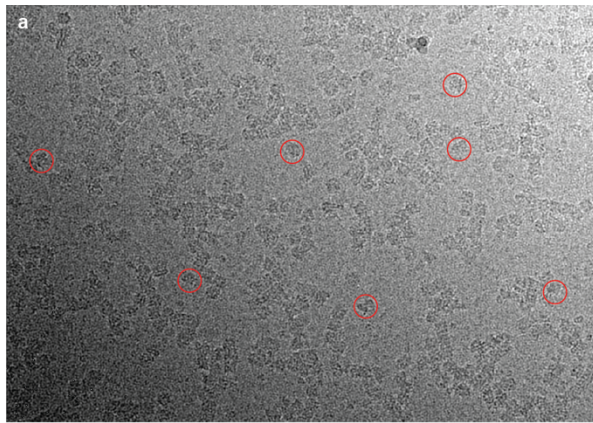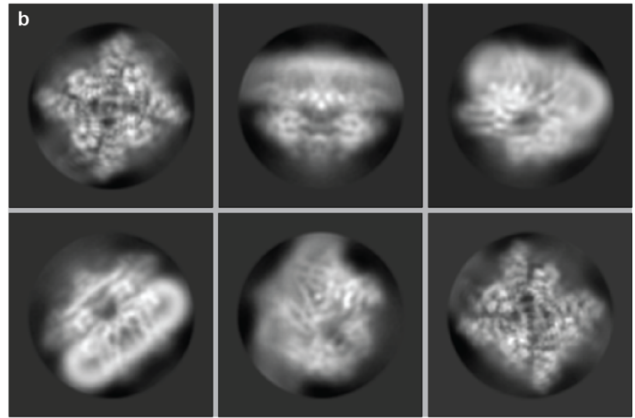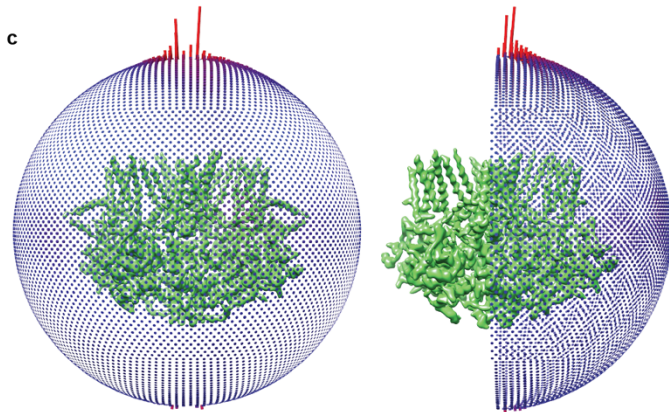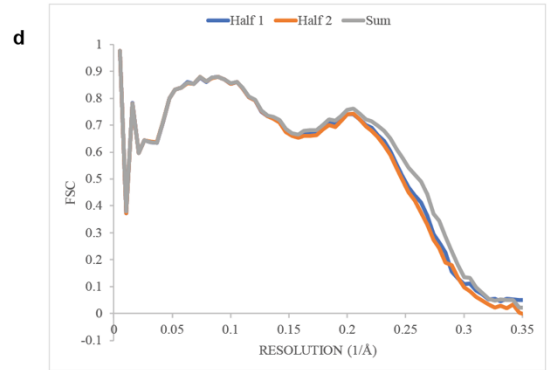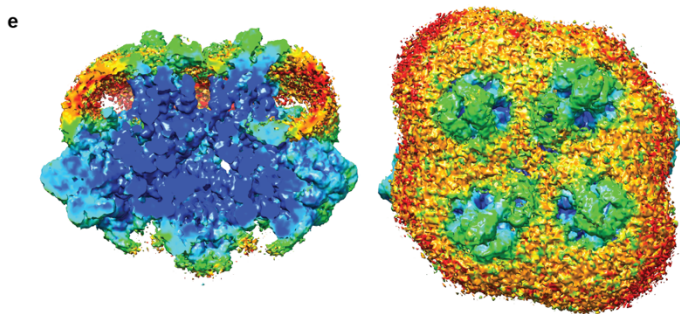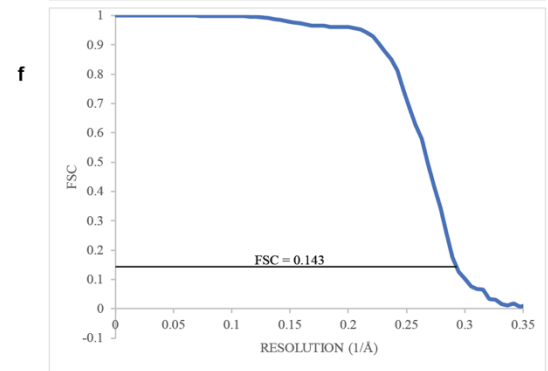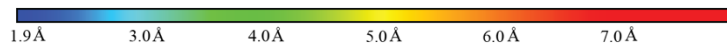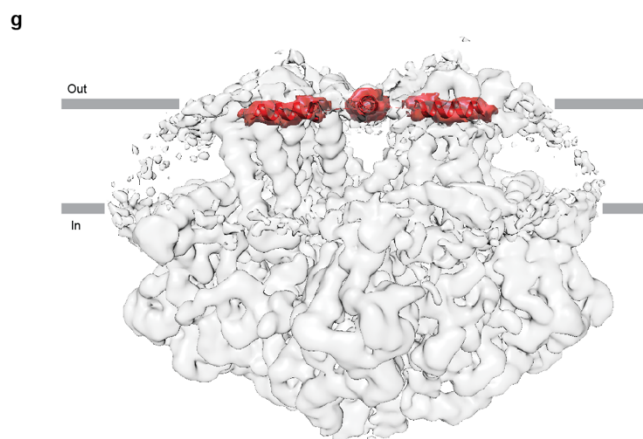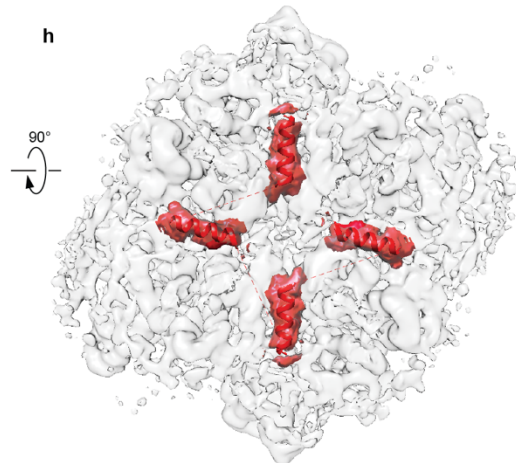

**Supplementary Figure 2. Cryo-EM overview of crTRP1 in nanodiscs.** **a**, Micrograph of crTRP1 taken using a Gatan K3 DED with example particles circled in red. **b**, Reference free 2D class averages of crTRP1 in different orientations. **c**, Euler angle distribution of particles contributing to the final reconstruction; larger red cylinders represent orientations comprising more particles. **d**, FSC curves calculated between two unfiltered half-maps and the final map and a model whose coordinates were randomized and refined against only half map 1. **e**, Local resolution predicted by ResMap. **f**, FSC curve calculated between half maps. **g-h**, Close-up views of the cryo-EM map illustrating densities for the P-loop helical portions modelled as poly-alanine  $\alpha$ -helices.

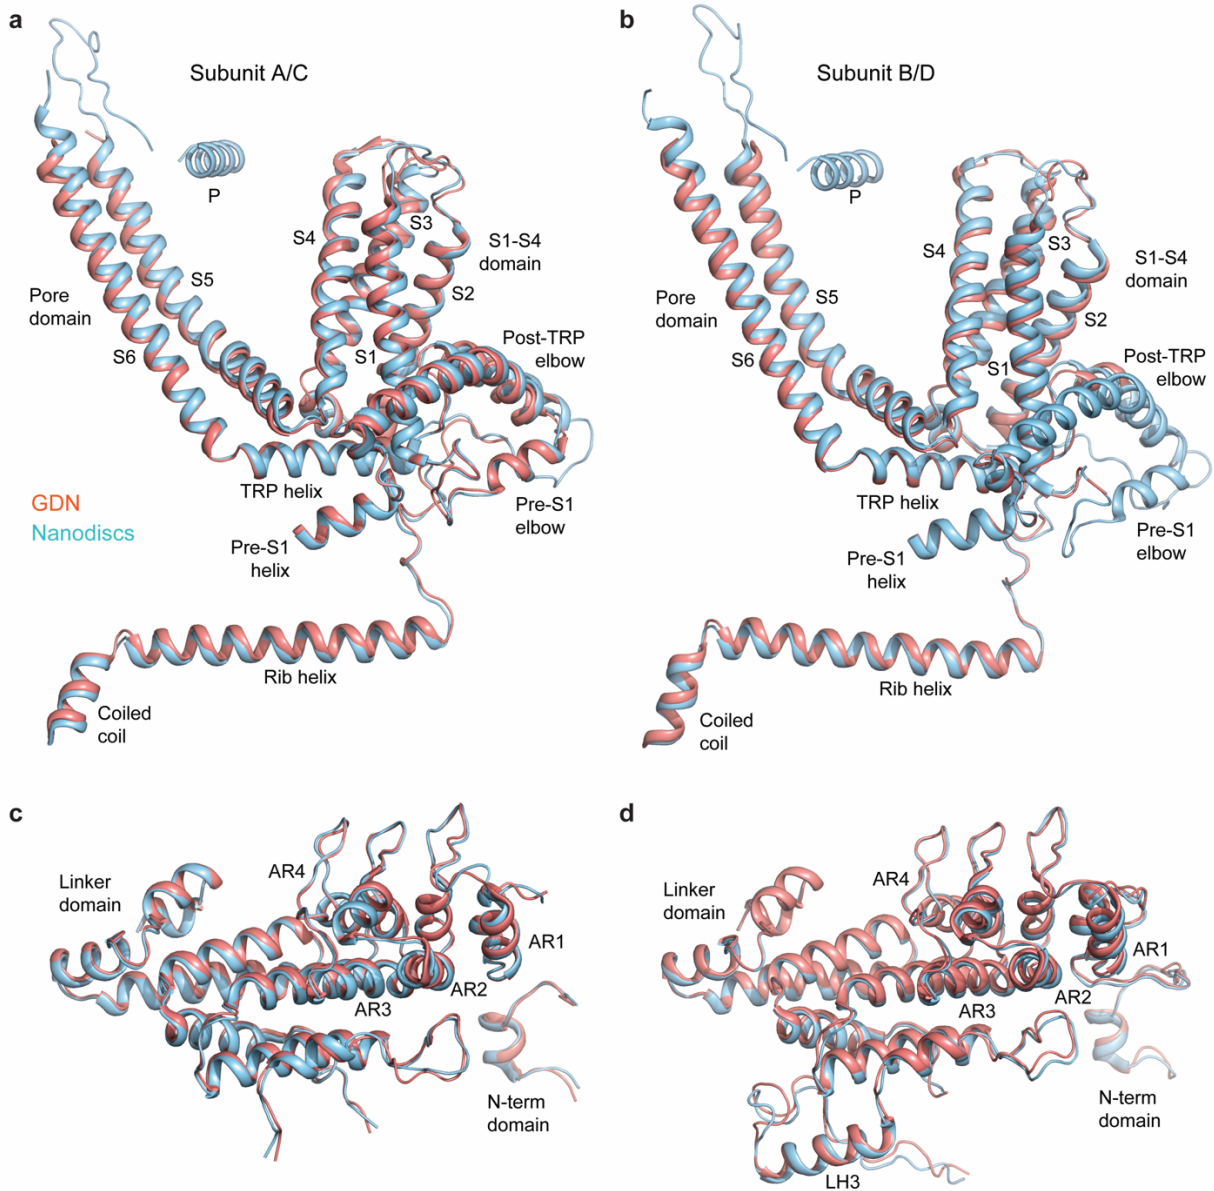

**Supplementary Figure 3. Comparison of crTRP1 structures in GDN and nanodiscs. a-b,** Structural superposition of the C-terminal portions of subunits A/C (**a**) and B/D (**b**) from crTRP1 structures in GDN (pink) and nanodisc (cyan). **c-d,** Similarly colored structural superposition of the N-terminal portions of subunits A/C (**c**) and B/D (**d**).

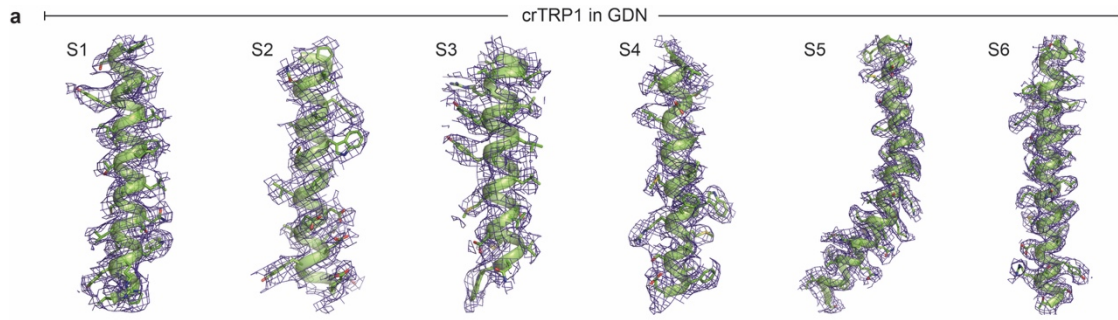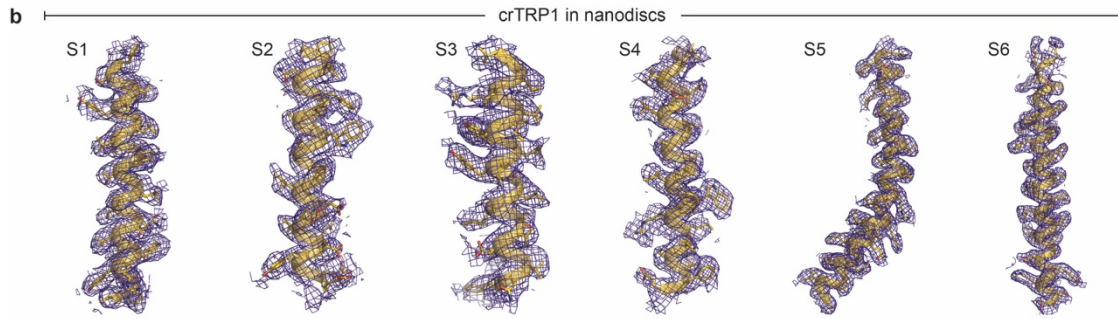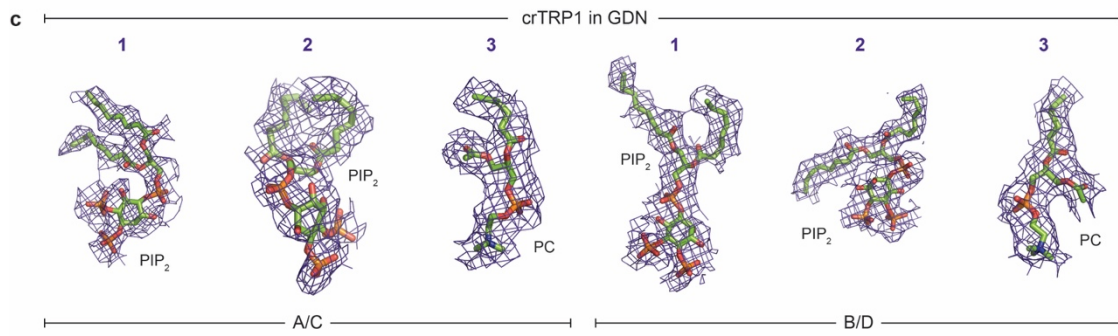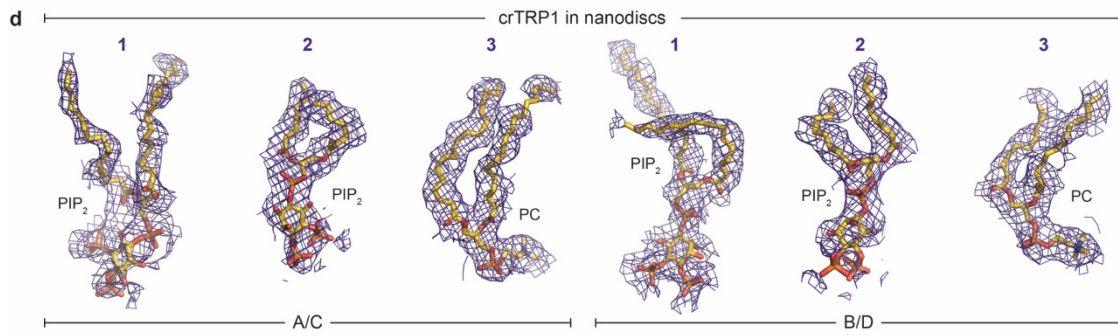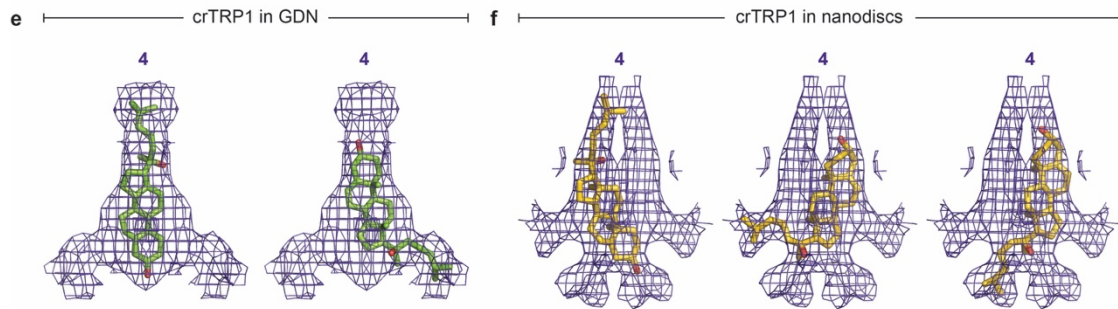

**Supplementary Figure 4. Cryo-EM density.** **a-b**, Transmembrane domain fragments of crTRP1 structures (subunit A) in GDN (**a**) and nanodisc (**b**), with the protein colored green (**a**) and yellow (**b**) and the corresponding cryo-EM density shown as purple mesh. **c-d**, Cryo-EM density of putative auxiliary lipids 1-3 fitted with molecules of PIP<sub>2</sub> (1-2) and PC (3), shown for the diagonal subunit pairs A/C and B/D of the crTRP1 structures in GDN (**a**) and nanodisc (**b**). **e-f**, Cryo-EM density of the putative central pore lipid 4 for the crTRP1 structures in GDN (**e**) and nanodisc (**f**), and fitted with cholesterol molecules in different orientations.

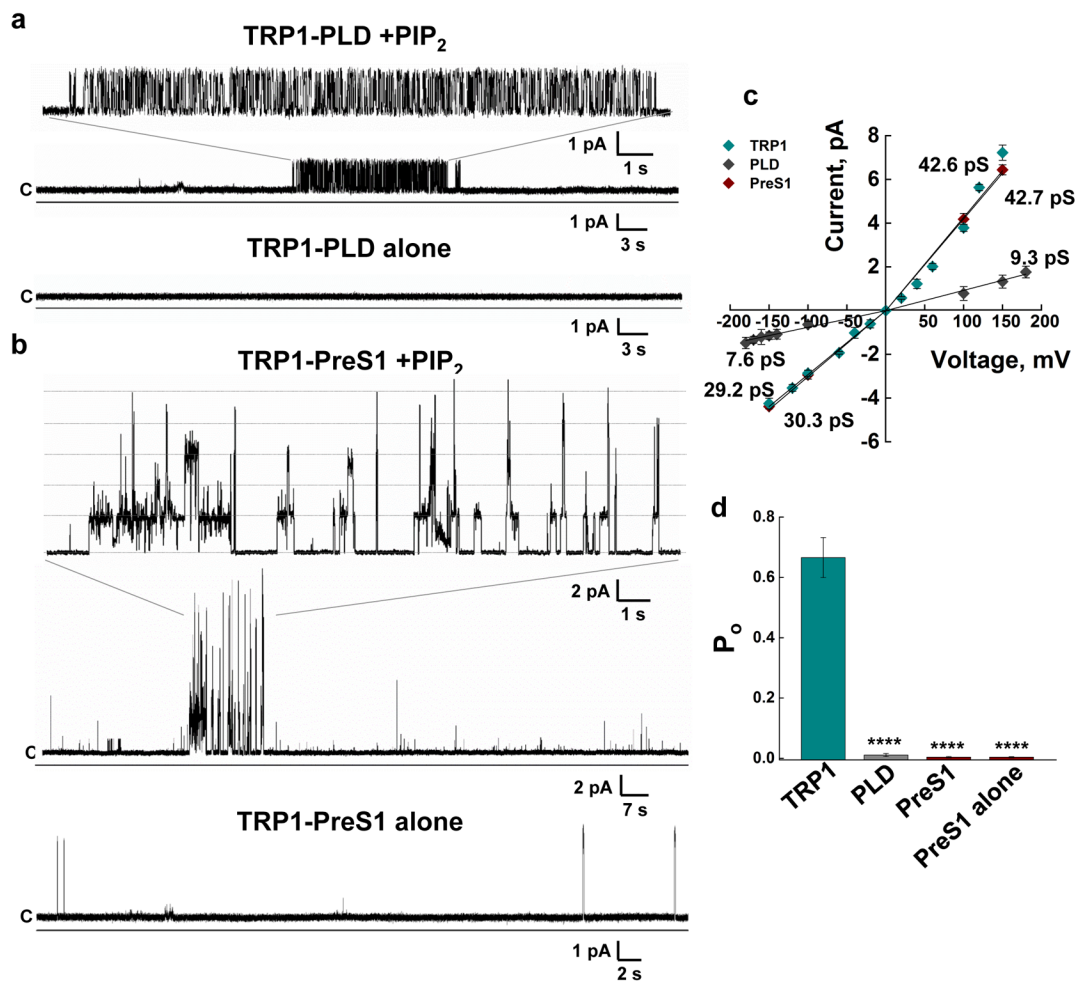

**Supplementary Figure 5. Functional characterization of crTRP1 mutants.** **a**, Representative planar lipid bilayer recordings of crTRP1-PLD obtained at 28 °C and +100 mV in the presence (upper traces) or absence (lower traces) of 2.5  $\mu$ M PIP<sub>2</sub> (n = 5; NE = 8,407). **b**, Representative current traces obtained for TRP1-PreS1ED (elbow deletion) in the presence (upper traces) or absence (lower traces) of 2.5  $\mu$ M PIP<sub>2</sub> (n = 8; NE = 3,197). **c**, I-V curves for wild type crTRP1, PLD (pore-loop deletion), and PreS1ED mutants obtained at 28°C (n = 27; NE = 167,158). **d**, Average values of P<sub>o</sub> measured at +100 mV for wild type and mutants (n = 16 independent experiments, NE = 78,347). The differences between P<sub>o</sub> values were calculated using One-Way ANOVA, with p = 2.4 x 10<sup>-6</sup> for the control vs. PLD, p = 4.9 x 10<sup>-7</sup> for the control vs. PreS1ED, and p = 1.2 x 10<sup>-7</sup> for the control vs. PreS1ED in the absence of PIP<sub>2</sub>. Error bars show SEM. Source data are provided as a Source Data file.



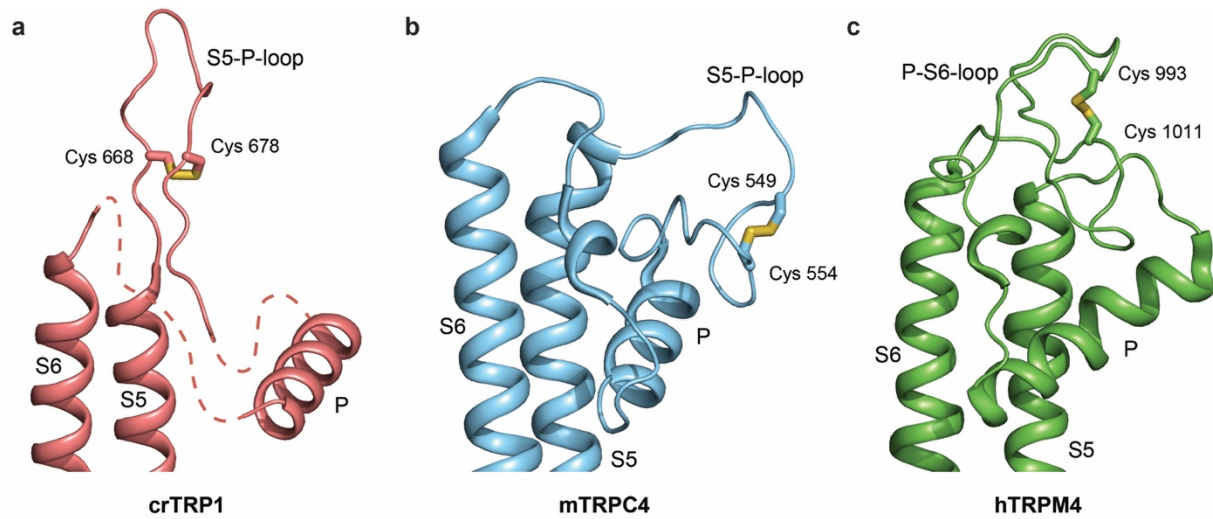

**Supplementary Figure 6. Disulfide bridges in the extracellular turrets of different TRP channels. a-c,** Views of the extracellular turret-forming region encompassing the P-loop in a single subunit of crTRP1 (**a**), mouse TRPC4 (**b**, PDB ID: 5Z96) and human TRPM4 (**c**, PDB ID: 6BQR). Crosslinked cysteines are shown as sticks. Unresolved regions of crTRP1 are shown as dashed lines.

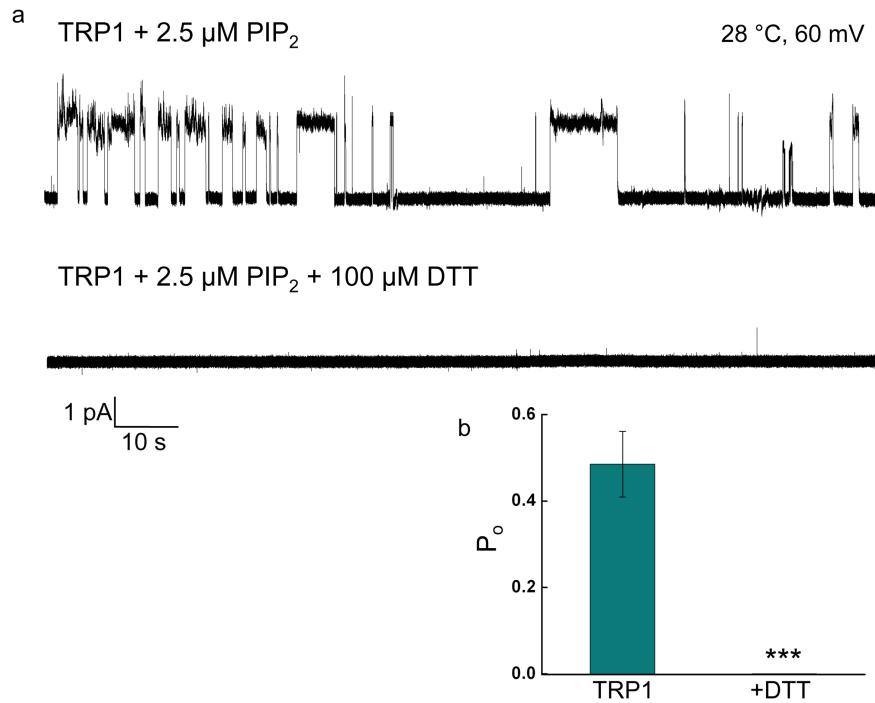

**Supplementary Figure 7. A reducing agent disrupts crTRP1 channel gating.** **a**, Representative single channel recordings of TRP1 in the presence of 2.5  $\mu\text{M}$  PIP<sub>2</sub> at 28 °C, held at 60 mV, before (top traces;  $P_o$   $0.49 \pm 0.076$ ) and after the addition of 100  $\mu\text{M}$  DTT (bottom traces;  $P_o$   $2.5 \times 10^{-5} \pm 2.5 \times 10^{-5}$ ). **b**, Open probability ( $P_o$ ) of TRP1 in the absence and presence of 100  $\mu\text{M}$  DTT,  $p = 6.9 \times 10^{-4}$  ( $n = 8$ , number of analyzed events = 1,264). Errors are SEM. Source data are provided as a Source Data file.

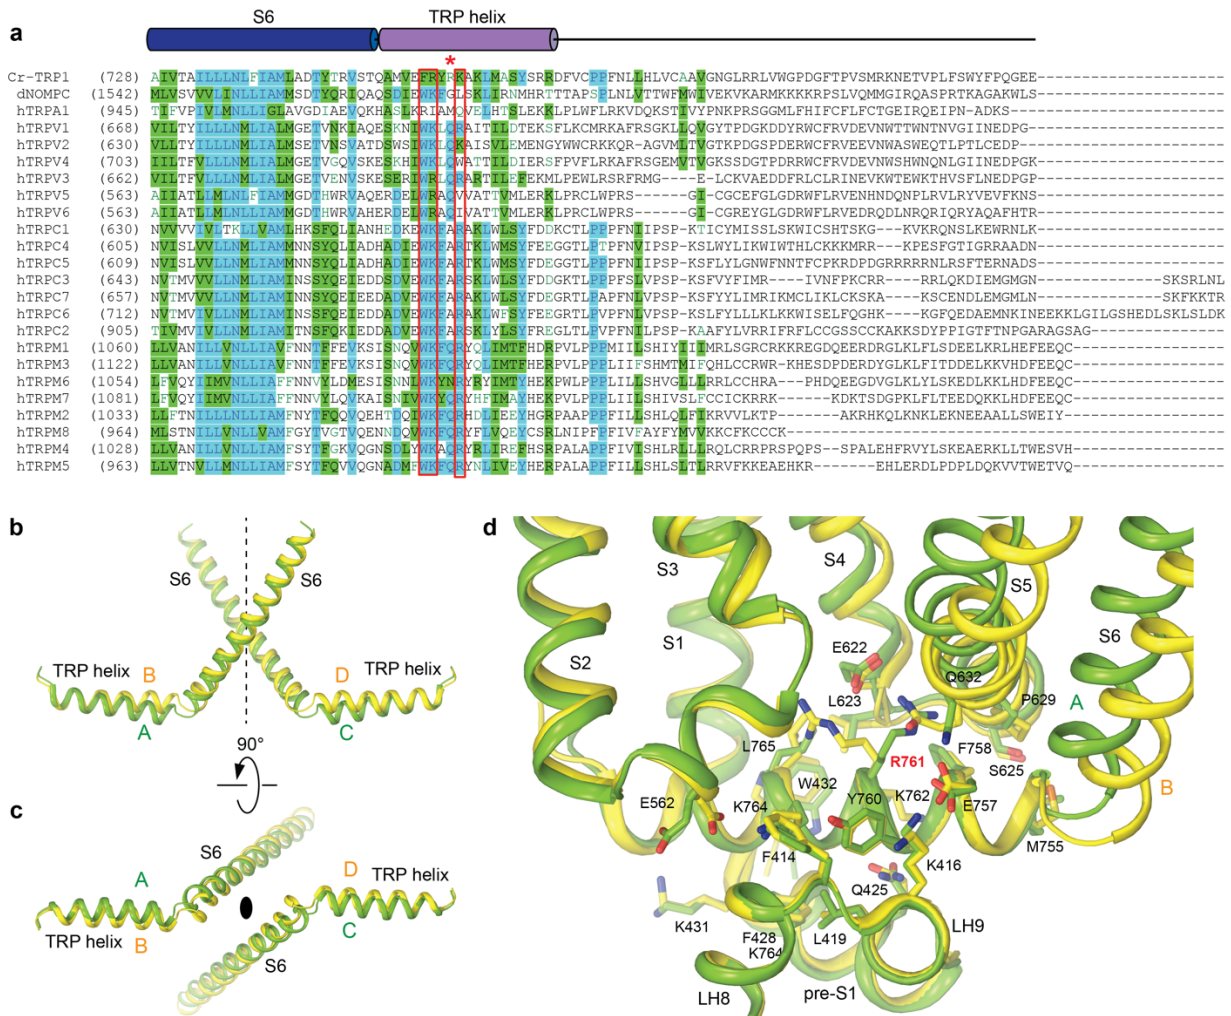

**Supplementary Figure 8. Sequence and Structure Analysis of the TRP domain of crTRP1.** **a**, Sequence alignment of the TRP domains from crTRP1 and other TRP channels. Three residues of the “WKFQR” TRP-box signature sequence are boxed. The tryptophan at position 1 is replaced by a phenylalanine and the positive charge is conserved at positions 2 and 5. Arginine R761, which is in different conformations in the two diagonal pairs of crTRP1 subunits (**d**), is indicated by a red star symbol. **b-d** Superposition of the S6 and TRP helices from diagonal pairs of subunits of a crTRP1 tetramer (**b**, **c**) and a view of the superposed TRP domains in subunits A and B with the surrounding residues (**d**).

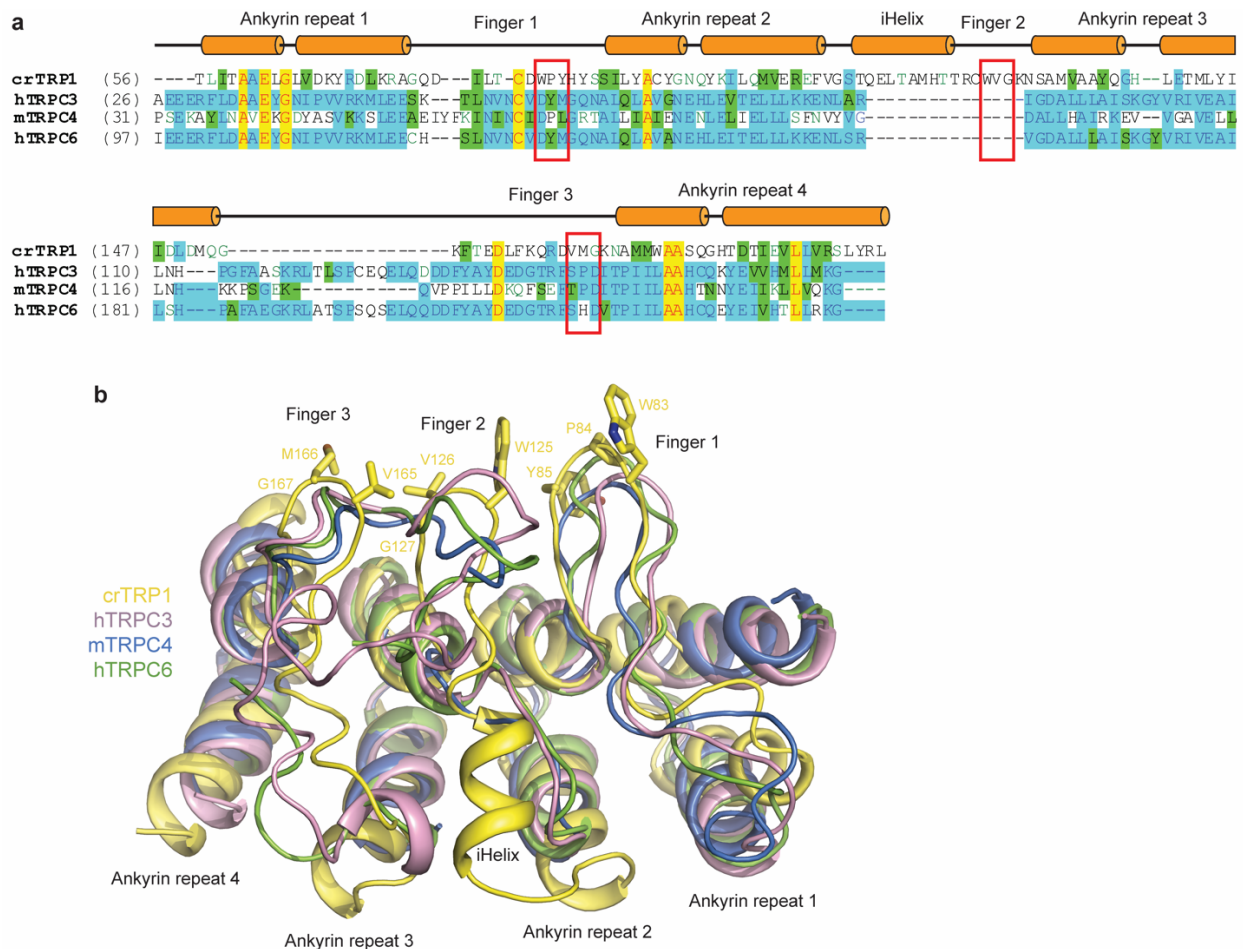

**Supplementary Figure 9. Comparison of the ankyrin repeat domains in crTRP1 and TRPC channels.** **a**, Structure-based sequence alignment of the ARDs in crTRP1 and human TRPC3, 4 and 6. Cylinders above the alignment indicate  $\alpha$ -helical regions, while red boxes indicate the ARD finger-tip regions. **b**, Structural superposition of the ARDs from crTRP1 (yellow), human TRPC3 (purple, PDB ID: 6CUD), mouse TRPC4 (blue, PDB ID: 5Z96) and human TRPC6 (green, PDB ID: 5YX9).

**Supplementary Table 1. Cryo-EM data collection, refinement and validation statistics**

|                                                  | crTRP1-GDN<br>(EMDB-20498)<br>(PDB 6PW4) | crTRP1-nanodisc<br>(EMDB-20499)<br>(PDB 6PW5) |
|--------------------------------------------------|------------------------------------------|-----------------------------------------------|
| <b>Data collection and processing</b>            |                                          |                                               |
| Magnification                                    | 130,000x                                 | 39,000x                                       |
| Voltage (kV)                                     | 300                                      | 300                                           |
| Electron exposure (e-/Å <sup>2</sup> )           | ~61                                      | ~71                                           |
| Defocus range (μm)                               | -1.0 to -3.0                             | -1.5 to -3.5                                  |
| Pixel size (Å)                                   | 1.06                                     | 0.95                                          |
| Symmetry imposed                                 | C2                                       | C2                                            |
| Initial particle images (no.)                    | 310,882                                  | 1,714,216                                     |
| Final particle images (no.)                      | 63,018                                   | 255,973                                       |
| Map resolution (Å)                               | 3.53                                     | 3.45                                          |
| FSC threshold                                    | 0.143                                    | 0.143                                         |
| Map resolution range (Å)                         | 2.12-5                                   | 1.9-4                                         |
| <b>Refinement</b>                                |                                          |                                               |
| Initial model used (PDB code)                    | This Study                               | This Study                                    |
| Model resolution (Å)                             | 3.53                                     | 3.45                                          |
| FSC threshold                                    | 0.143                                    | 0.143                                         |
| Model resolution range (Å)                       | 2.12-5                                   | 1.9-4                                         |
| Map sharpening <i>B</i> factor (Å <sup>2</sup> ) | -116                                     | -188                                          |
| Model composition                                |                                          |                                               |
| Non-hydrogen atoms                               | 22,348                                   | 24,740                                        |
| Protein residues                                 | 2742                                     | 3032                                          |
| Ligands                                          | 10                                       | 12                                            |
| <i>B</i> factors (Å <sup>2</sup> )               |                                          |                                               |
| Protein                                          | 50.09                                    | 42.43                                         |
| Ligand                                           | 59.91                                    | 50.83                                         |
| R.m.s. deviations                                |                                          |                                               |
| Bond lengths (Å)                                 | 0.007                                    | 0.013                                         |
| Bond angles (°)                                  | 1.081                                    | 1.341                                         |
| Validation                                       |                                          |                                               |
| MolProbity score                                 | 1.87                                     | 1.98                                          |
| Clashscore                                       | 5.63                                     | 4.38                                          |
| Poor rotamers (%)                                | 0.38                                     | 1.61                                          |
| Ramachandran plot                                |                                          |                                               |
| Favored (%)                                      | 89.27                                    | 87.62                                         |
| Allowed (%)                                      | 10.66                                    | 11.62                                         |
| Disallowed (%)                                   | 0.07                                     | 0.77                                          |
